# Supplementary material for: Adverse Drug Reactions in Children: Comparison of Reports Collected in a Pharmacovigilance Project Versus Spontaneously Collected ADR Reports
Source: PubMed Central journal article supplement — Paediatr Drugs. 2022 Nov 12;25(2):203–15. doi: 10.1007/s40272-022-00540-z (PMC9931796; doi:10.1007/s40272-022-00540-z), 2022-11-12
Supplement: 40272_2022_540_MOESM1_ESM.pdf [file 40272_2022_540_MOESM1_ESM.pdf]

## Electronic supplementary material [ESM])

**Title: Adverse drug reactions in children: comparison of reports collected in a pharmacovigilance project versus spontaneously collected ADR reports**

Journal: Pediatric drugs

### Authors' full names

Leitzen S.<sup>1,2,3,\*</sup>, Dubrall D.<sup>1,3,\*</sup>, Toni I.<sup>4</sup>, Stingl J.<sup>5</sup>, Christ P.<sup>1,3</sup>, Köberle U.<sup>7</sup>, Schmid M.<sup>3</sup>,  
Neubert A.<sup>4</sup>, Sachs B.<sup>1,6,\*</sup>

\* contributed equally

### Authors' institutional affiliations including city and country

<sup>1</sup>Federal Institute for Drugs and Medical Devices, Research Division, Bonn, Germany

<sup>2</sup>University of Southern Denmark, Department of Physics, Chemistry and Pharmacy, Odense,  
Denmark

<sup>3</sup>Institute for Medical Biometry, Informatics and Epidemiology, University Hospital of Bonn, Bonn,  
Germany

<sup>4</sup>Universitätsklinikum Erlangen, Department of Paediatrics and Adolescent Medicine, Erlangen,  
Germany

<sup>5</sup>Institute of Clinical Pharmacology, University Hospital of the RWTH Aachen, Aachen, Germany

<sup>6</sup>Department for Dermatology and Allergy, University Hospital Aachen, Aachen, Germany

<sup>7</sup>Drug Commission of the German Medical Association, Berlin, Germany

### Corresponding author

Diana Dubrall, [Diana.Dubrall@bfarm.de](mailto:Diana.Dubrall@bfarm.de)

The analyzed ADRs cover also medication error related ADRs [7, 17]. Due to the extension of the ADR definition in 2012, conditions like overdose, misuse, abuse, medication errors and occupational exposure are now included in the ADR definition. Although, theoretically all such reports retrieved in our analyses should be associated with a suspected ADR, we cannot exclude the presence of reports not being associated with a co-suspected ADR among them (see section 2.5).

**Table 1.** Evaluation of documentation quality.

|       | <b>KiDSafe reports<br/>(systematically collected<br/>reports)<br/>n = 845</b> | <b>EudraVigilance reports<br/>(spontaneous reports)<br/><br/>n = 697</b> |
|-------|-------------------------------------------------------------------------------|--------------------------------------------------------------------------|
| Mean  | 0.64                                                                          | 0.63                                                                     |
| SD    | 0.25                                                                          | 0.25                                                                     |
| IQR   | 0.45                                                                          | 0.48                                                                     |
| Q0    | 0.22                                                                          | 0.17                                                                     |
| Q25   | 0.45                                                                          | 0.42                                                                     |
| Q50   | 0.61                                                                          | 0.61                                                                     |
| Q75   | 0.90                                                                          | 0.9                                                                      |
| Q100  | 1                                                                             | 1                                                                        |
| Range | 0.22-1                                                                        | 0.17-1                                                                   |

SD = standard deviation. IQR= interquartile range. Q0= lowest value. Q25=lowest quartile.

Q50=medium quartile. Q75= upper quartile. Q100= highest value. Range = from lowest to highest value

**Table 2.** Primary reporting source.

|         | <b>KiDSafe reports<br/>(systematically collected<br/>reports)<br/>n = 845</b> | <b>EudraVigilance reports<br/>(spontaneous reports)<br/>n = 697</b> |
|---------|-------------------------------------------------------------------------------|---------------------------------------------------------------------|
| HCP     | 845<br>(100.0 %)                                                              | 609<br>(87.4 %)                                                     |
| non-HCP | 0<br>(0.0 %)                                                                  | 88<br>(12.6 %)                                                      |

HCP = Healthcare Professionals; non-HCP = non- Healthcare Professionals

**Table 3.** Seriousness criteria. Multiple assignments were possible.

| <b>Seriousness Criterion</b> | <b>KiDSafe reports (systematically collected reports) n = 845</b> | <b>EudraVigilance reports (spontaneous reports) n = 692<sup>a</sup></b> |
|------------------------------|-------------------------------------------------------------------|-------------------------------------------------------------------------|
| Death                        | 1<br>0.1 %                                                        | 16<br>2.3 %                                                             |
| Life-threatening             | 70<br>8.3 %                                                       | 95<br>13.7 %                                                            |
| Hospitalisation              | 845<br>100.0 %                                                    | 692<br>100.0 %                                                          |
| Disabling                    | 1<br>0.1 %                                                        | 9<br>1.3 %                                                              |
| Congenital Anomaly           | 0<br>0.0 %                                                        | 11<br>1.6 %                                                             |
| Other                        | 149<br>17.6 %                                                     | 211<br>30.5 %                                                           |

<sup>a</sup>This in depth analysis was performed on a later date than the analyses depicted in the main manuscript. The main manuscript refers to 697 reports. However, 5 cases were subsequently deleted from EudraVigilance by the EMA and thus the analyses depicted above refers to n=692 reports.

**Table 4.** Age and sex distribution.

| Age group | KiDSafe reports<br>(systematically collected reports)<br>n = 843 <sup>a</sup> |                              |                            |                                     | EudraVigilance reports<br>(spontaneous reports)<br>n = 696 <sup>a</sup> |                              |                            |                                      |
|-----------|-------------------------------------------------------------------------------|------------------------------|----------------------------|-------------------------------------|-------------------------------------------------------------------------|------------------------------|----------------------------|--------------------------------------|
|           | SUM                                                                           | Female<br>(n= 479,<br>56.8%) | Male<br>(n= 361,<br>42.8%) | Not<br>specified<br>(n= 4,<br>0.5%) | SUM                                                                     | Female<br>(n= 358,<br>51.4%) | Male<br>(n= 325,<br>46.7%) | Not<br>specified<br>(n= 13,<br>1.9%) |
| 0-1M      | 6<br>100.0%                                                                   | 3<br>50.0%                   | 3<br>50.0%                 | 0<br>0.0%                           | 48<br>100%                                                              | 12<br>25.0%                  | 32<br>66.7%                | 4<br>8.3%                            |
| 2M-1Y     | 100<br>100.0%                                                                 | 42<br>42.0%                  | 58<br>58.0%                | 0<br>0.0%                           | 81<br>99.9%                                                             | 41<br>50.6%                  | 36<br>44.4%                | 4<br>4.9%                            |
| 2-3Y      | 95<br>100%                                                                    | 37<br>38.9%                  | 57<br>60.0%                | 1<br>1.1%                           | 57<br>100%                                                              | 24<br>42.1%                  | 33<br>57.9%                | 0<br>0.0%                            |
| 4-6Y      | 83<br>100%                                                                    | 36<br>43.4%                  | 47<br>56.6%                | 0<br>0.0%                           | 56<br>100%                                                              | 26<br>46.4%                  | 29<br>51.8%                | 1<br>1.8%                            |
| 7-12Y     | 157<br>99.9%                                                                  | 77<br>49.0%                  | 79<br>50.3%                | 1<br>0.6%                           | 175<br>100.1%                                                           | 82<br>46.9%                  | 92<br>52.6%                | 1<br>0.6%                            |
| 13-17Y    | 402<br>100%                                                                   | 283<br>70.4%                 | 117<br>29.1%               | 2<br>0.5%                           | 279<br>100%                                                             | 173<br>62.0%                 | 103<br>36.9%               | 3<br>1.1%                            |

<sup>a</sup>Two reports from the KiDSafe group and one report from the EudraVigilance group were without age information.

**Table 5.** Top 10 drugs most frequently reported as suspected.

| Top 10 suspected drugs<br>KiDSafe reports<br>(systematically collected reports)<br>n = 845 |      |    | Top 10 suspected drugs<br>EudraVigilance reports<br>(spontaneous reports)<br>n = 697 |      |    |
|--------------------------------------------------------------------------------------------|------|----|--------------------------------------------------------------------------------------|------|----|
| IBUPROFEN                                                                                  | 7.5% | 63 | INSULIN ASPART                                                                       | 6.0% | 42 |
| LEVETIRACETAM                                                                              | 6.6% | 56 | MITE ALLERGEN EXTRACT                                                                | 4.4% | 31 |
| INSULIN ASPART                                                                             | 5.7% | 48 | ALLERGENS                                                                            | 3.6% | 25 |
| VALPROIC ACID                                                                              | 5.6% | 47 | PALIVIZUMAB                                                                          | 3.6% | 25 |
| METHYLPHENIDATE                                                                            | 4.1% | 35 | METHYLPHENIDATE                                                                      | 3.0% | 21 |
| OXCARBAZEPINE                                                                              | 3.6% | 30 | IBUPROFEN                                                                            | 2.6% | 18 |
| LAMOTRIGINE                                                                                | 3.4% | 29 | VALPROIC ACID                                                                        | 2.4% | 17 |
| PARACETAMOL                                                                                | 3.3% | 28 | ADALIMUMAB                                                                           | 2.2% | 15 |
| AMOXICILLIN                                                                                | 2.7% | 23 | CORYLUS AVELLANA                                                                     | 2.2% | 15 |
| INSULIN GLARGINE                                                                           | 2.7% | 23 | PLANTAGO LANCEOLATA                                                                  | 2.2% | 15 |

**Table 6.** Drugs most frequently reported as suspected per age group within the KiDSafe reports (systematically collected reports; n = 845).

| 0-1M                                                                                                          |      |         | 2M-1Y                                                                                                                                                |      |           | 2-3Y                                                                                                                                                                      |      |          | 4-6Y                                                                                                                              |      |          | 7-12Y                         |      |           | 13-17Y                        |      |           |
|---------------------------------------------------------------------------------------------------------------|------|---------|------------------------------------------------------------------------------------------------------------------------------------------------------|------|-----------|---------------------------------------------------------------------------------------------------------------------------------------------------------------------------|------|----------|-----------------------------------------------------------------------------------------------------------------------------------|------|----------|-------------------------------|------|-----------|-------------------------------|------|-----------|
| Active Substance (High Level)                                                                                 | in % | (n = 6) | Active Substance (High Level)                                                                                                                        | in % | (n = 100) | Active Substance (High Level)                                                                                                                                             | in % | (n = 95) | Active Substance (High Level)                                                                                                     | in % | (n = 83) | Active Substance (High Level) | in % | (n = 157) | Active Substance (High Level) | in % | (n = 402) |
| CAFFEINE.<br>ERYTHRO-<br>MYCIN.<br>OPIPR-<br>MOL.<br>PERME-<br>THRIN.<br>THEO-<br>PHYLLIN.<br>ZIDO-<br>VUDINE | 16.7 | 1       | LEVETIRACETAM                                                                                                                                        | 13   | 13        | VALPROIC ACID                                                                                                                                                             | 8.4  | 8        | OXCARBA-<br>ZEPINE                                                                                                                | 13.3 | 11       | INSULIN<br>ASPART             | 8.9  | 14        | IBUPROFEN                     | 11.4 | 46        |
|                                                                                                               |      |         | AMOXICILLIN                                                                                                                                          | 8    | 8         | LEVETIRA-<br>CETAM                                                                                                                                                        | 6.3  | 6        | LEVETIR-<br>ACETAM/<br>VALPROIC<br>ACID                                                                                           | 10.8 | 9        | VALPROIC ACID                 | 8.3  | 13        | INSULIN ASPART                | 8.2  | 33        |
|                                                                                                               |      |         | VALPROIC ACID/<br>CEFACTOR                                                                                                                           | 6    | 6         | CICLO-<br>SPORIN                                                                                                                                                          | 5.3  | 5        | SALBU-<br>TAMOL/<br>SULTIAME                                                                                                      | 4.8  | 4        | OXCARBAZEPIN<br>E             | 7.6  | 12        | PARACETAMOL                   | 6.5  | 26        |
|                                                                                                               |      |         | CO-TRIMOXAZOLE                                                                                                                                       | 4    | 4         | DIMEN-<br>HYDRINATE/<br>IBUPROFEN                                                                                                                                         | 4.2  | 4        | AMOXI-<br>CILLIN/CLOB<br>AZAM                                                                                                     | 3.6  | 3        | METHYLPHENID<br>ATE           | 7.0  | 11        | METHYLPHENIDATE               | 5.7  | 23        |
|                                                                                                               |      |         | CEFIXIME.IBUPROFEN.<br>LAMOTRIGINE. PHENO-<br>BARBITAL.<br>PREDNISOLONE.<br>SALBUTAMOL. SULTAMI-<br>CILLIN. TACROLIMUS.<br>TOPIRAMATE                | 3    | 3         | CEFACTOR.<br>DIMETINDEN.<br>LORAZEPAM.<br>AMOXI-CILLIN                                                                                                                    | 3.2  | 3        | CEFACTOR.<br>CEFUROX-<br>IME.DIAZEP<br>AM.FLUTICA<br>SONE.IBUPR<br>OFEN.INSULI<br>N                                               |      |          | LEVETIRACETA<br>M             | 6.4  | 10        | FLUOXETINE                    | 4.7  | 19        |
|                                                                                                               |      |         | CEFPODOXIME. CEFU-<br>ROXIME CIPROFLOXACIN.<br>CLOBAZAM. DIMEN-<br>HYDRINATE. FLUTICA-<br>SONE. LITHIUM. METHO-<br>TREXATE. TRAMADOL.<br>VIGABATRIN. | 2    | 2         | FERROUS<br>GLYCINE.<br>CEFUROXIME.<br>ERYTHROMYC<br>IN.ETHOSUXI<br>MIDE.HALOPE<br>RAIDOL.LAMO<br>TRIGINE.MYC<br>OPHENOLATE.<br>PREDNISOLON<br>E.TACROLIMU<br>S.VIGABATRIN | 2.1  | 2        | HUMAN.LEV<br>OTHYROXIN<br>E.MIDAZOLA<br>M.MYCOPHE<br>NOLATE.PAR<br>ACETAMOL.<br>SULFAMETH<br>OXAZOLE.VI<br>GABATRIN.V<br>ITAMIN D | 2.4  | 2        | IBUPROFEN                     | 5.1  | 8         | LAMOTRIGINE                   | 4.2  | 17        |
|                                                                                                               |      |         | XYLOMETAZOLINE                                                                                                                                       | 2    | 2         |                                                                                                                                                                           |      |          |                                                                                                                                   |      |          |                               |      |           |                               |      |           |

**Table 7.** Drugs most frequently reported as suspected per age group within the EudraVigilance reports (spontaneous reports; n = 697).

| 0-1M                                           |      |        | 2M-1Y                                                                                                                                                                                                                                       |      |        | 2-3Y                                                                                                                    |      |        | 4-6Y                                                                                                                                                                 |      |        | 7-12Y                         |      |         | 13-17Y                          |      |         |
|------------------------------------------------|------|--------|---------------------------------------------------------------------------------------------------------------------------------------------------------------------------------------------------------------------------------------------|------|--------|-------------------------------------------------------------------------------------------------------------------------|------|--------|----------------------------------------------------------------------------------------------------------------------------------------------------------------------|------|--------|-------------------------------|------|---------|---------------------------------|------|---------|
| Active Substance (High Level)                  | in % | n = 48 | Active Substance (High Level)                                                                                                                                                                                                               | in % | n = 81 | Active Substance (High Level)                                                                                           | in % | n = 57 | Active Substance (High Level)                                                                                                                                        | in % | n = 56 | Active Substance (High Level) | in % | n = 175 | Active Substance (High Level)   | in % | n = 279 |
| MISOPROSTOL                                    | 12.5 | 6      | PALIVIZUMAB                                                                                                                                                                                                                                 | 29.6 | 24     | NUSINERSEN                                                                                                              | 12.3 | 7      | VALPROIC ACID                                                                                                                                                        | 8.9  | 5      | MITE ALLERGEN EXTRACT         | 13.7 | 24      | INSULIN ASPART                  | 7.5  | 21      |
| PAROXETINE                                     | 4.2  | 2      | DIMENHYDRINATE                                                                                                                                                                                                                              | 4.9  | 4      | AMOXICILLIN                                                                                                             | 5.3  | 3      | INSULIN ASPART                                                                                                                                                       | 7.1  | 4      | ALLERGENS                     | 10.3 | 18      | METHYLPHENIDATE                 | 5.4  | 15      |
| PIVMECILLINAM                                  | 4.2  | 2      | CYTARABINE                                                                                                                                                                                                                                  | 3.7  | 3      | ASFOTASE ALFA.<br>CANDESARTAN.<br>CEFACTOR.<br>CEFUROXIME.<br>ECULIZUMAB.<br>IBUPROFEN.<br>INFLIXIMAB.<br>VALPROIC ACID | 3.5  | 2      | IBUPROFEN                                                                                                                                                            | 5.4  | 3      | INSULIN ASPART                | 8.0  | 14      | METAMIZOLE                      | 3.9  | 11      |
| 55 further drugs and combinations <sup>a</sup> | 2.1  | 1      | PREDNISON                                                                                                                                                                                                                                   | 3.7  | 3      |                                                                                                                         |      |        | MIDAZOLAM                                                                                                                                                            | 5.4  | 3      | CORYLUS AVELLANA              | 5.7  | 10      | ADALIMUMAB                      | 3.6  | 10      |
|                                                |      |        | VINCRIStINE                                                                                                                                                                                                                                 | 3.7  | 3      |                                                                                                                         |      |        | OXCARBAZEPI NE                                                                                                                                                       | 5.4  | 3      | PLANTAGO LANCEOLATA           | 5.7  | 10      | DIENOGEST.<br>ETHINYLESTRADIOL  | 3.2  | 9       |
|                                                |      |        | ADALIMUMAB.<br>ALEMTUZUMAB.<br>ALPROSTADIL.<br>AMOXICILLIN.<br>BLINATUMOMAB.<br>CEFACTOR.<br>CEFIXIME.<br>CEFUROXIME.<br>CYCLOPHOSPHAMI DE.<br>FLUDARABINE.<br>INSULIN ASPART.<br>PEGINTERFERON BETA-1A.<br>PHENPROCOUMON.<br>SULTAMICILLIN | 2.5  | 2      |                                                                                                                         |      |        | SALBUTAMOL                                                                                                                                                           | 5.4  | 3      | SECALE CEREALE                | 5.7  | 10      | IBUPROFEN                       | 2.9  | 8       |
|                                                |      |        | AZACITIDINE.<br>EVEROLIMUS.<br>FLUTICASONE.<br>HUMAN NORMAL IMMUNO- GLOBULI.<br>LAMOTRIGIN.<br>SULTIAME                                                                                                                                     | 3.6  | 2      |                                                                                                                         |      |        | ALNUS.<br>ALUMINIUM HYDROXIDE.<br>ARTEMISIA VULGARIS.<br>BETULA. CORYLUS AVELLANA.<br>PHLEUM PRATENSE.<br>PLANTAGO LANCEOLATA.<br>TRITICUM AESTIVUM and Combinations | 5.1  | 9      | MYCOPHENOLIC ACID             | 2.9  | 8       |                                 |      |         |
|                                                |      |        |                                                                                                                                                                                                                                             |      |        |                                                                                                                         |      |        |                                                                                                                                                                      |      |        |                               |      |         |                                 |      |         |
|                                                |      |        |                                                                                                                                                                                                                                             |      |        |                                                                                                                         |      |        |                                                                                                                                                                      |      |        |                               |      |         | ISOTRETINOIN.<br>METOCLOPRAMIDE | 2.5  | 7       |

<sup>a</sup>ALEMTUZUMAB, AMISULPRIDE, AMITRIPTYLINE, AMPICILLIN, SULBACTAM, ARIPIRAZOLE, CAFFEINE, CANDESARTAN, CERTOLIZUMAB,

CLOZAPINE, COLECALCIFEROL, CYTARABINE, DAUNORUBICIN, DOXEPIN, DRONABINOL, ESKETAMINE, ETOPOSIDE, GLATIRAMER, INFLIXIMAB,



INSULIN ASPART, INSULIN HUMAN, INTERFERON BETA-1A, KETAMINE, KLEBSIELLA PNEUMONIAE (INACTIVATED), LAMOTRIGINE, LANOLIN, LIDOCAINE, PRILOCAINE, LISINAPRIL, METFORMIN HYDROCHLORIDE (& Combinations), METHYLDOPA, METYRAPONE, NATALIZUMAB, NIFEDIPINE, NITRIC OXIDE, NITROUS OXIDE & OXYGEN, OCTENIDINE DIHYDROCHLORIDE, OPIPRAMOL, OXYCODONE, OXYMETAZOLINE, PALIVIZUMAB, PARACETAMOL, PENTOXYVERINE, PHENOBARBITAL, PHENYLEPHRINE, POTASSIUM (& Combinations), PREGABALIN, PRILOCAINE, PROPOFOL, RIVAROXABAN, SERTRALINE, SILDENAFIL, TRAMADOL, TROPICAMIDE

**Table 8.** Reported medical history.

| Patient Medical History PT<br>KiDSafe reports<br>(systematically collected reports)<br><br>n = 729 with medical history |        |         | Patient Medical History PT<br>EudraVigilance reports<br>(spontaneous reports)<br><br>n = 519 with medical history |       |        |
|-------------------------------------------------------------------------------------------------------------------------|--------|---------|-------------------------------------------------------------------------------------------------------------------|-------|--------|
| Epilepsy <sup>a</sup>                                                                                                   | 18.4 % | n = 134 | Type 1 diabetes mellitus                                                                                          | 7.1 % | n = 37 |
| Type 1 diabetes mellitus                                                                                                | 10.3 % | n = 75  | Epilepsy <sup>a</sup>                                                                                             | 6.9 % | n = 36 |
| Depression                                                                                                              | 7.8 %  | n = 57  | Asthma                                                                                                            | 6.2 % | n = 32 |
| Attention deficit hyperactivity disorder                                                                                | 6.3 %  | n = 46  | Premature baby                                                                                                    | 6.2 % | n = 32 |
| Pyrexia                                                                                                                 | 5.8 %  | n = 42  | Non-tobacco user                                                                                                  | 5.4 % | n = 28 |
| Partial seizures                                                                                                        | 4.9 %  | n = 36  | Depression                                                                                                        | 4.4 % | n = 23 |
| Developmental delay                                                                                                     | 4.9 %  | n = 36  | Attention deficit hyperactivity disorder                                                                          | 4.2 % | n = 22 |
| Upper respiratory tract infection                                                                                       | 3.4 %  | n = 25  | Abstains from alcohol                                                                                             | 4.0 % | n = 21 |
| Asthma                                                                                                                  | 3.3 %  | n = 24  | Seasonal allergy                                                                                                  | 4.0 % | n = 21 |
| Obesity                                                                                                                 | 3.2 %  | n = 23  | Hypersensitivity                                                                                                  | 3.5 % | n = 18 |

<sup>a</sup> In addition, the number of reports related to epilepsy was analyzed on HLT-level in both datasets in order to prevent inconsistent epilepsy coding in the spontaneous reports which could have resulted in a lower number of these reports. At the HLT-level, the terms *absence seizures*, *generalized tonic-clonic seizures*, *partial complex seizures*, *partial simple seizures NEC*, and *seizures and seizure disorders NEC* were included. For the systematically collected reports, the share was 25.4% (185/729), and for the spontaneous reports 6.9% (59/519).
